# Supplementary material
Source: PubMed Central journal article supplement (PMC4901884)
Supplement: supp_dew106_dew106supp_fig1.pdf [file supp_dew106_dew106supp_fig1.pdf]

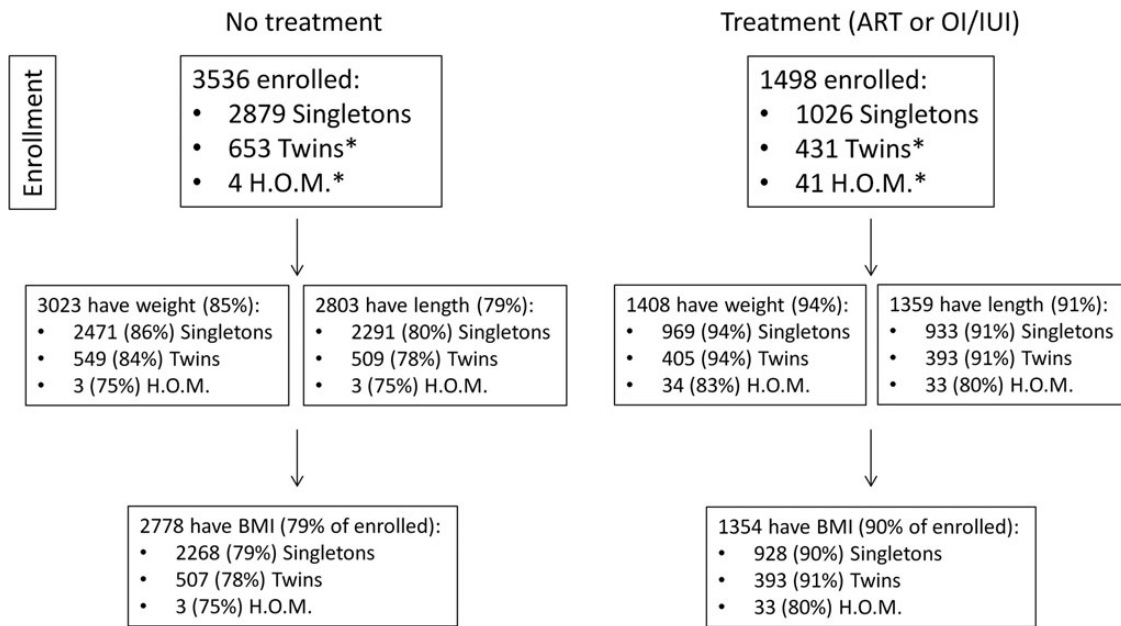

\*Numbers of twins and higher order multiples (H.O.M.) are from the primary cohort. Participants were included in analyses if they had weight/length information beyond birth. BMI required weight and length reported for the same time point.

**Supplementary Figure S1** Flow diagram of mothers who provided data for growth in Upstate KIDS.
